1 **Title Page**

2 **Authors**

3 Muhammed Rezwan Kabir and Heather M. Nonhebel\*

4 **Title**

5 Reinvestigation of grain weight genes *TaTGW6* and *OsTGW6* casts doubt on their role in  
6 auxin regulation in developing grains

7 **Affiliations**

8 School of Science and Technology, University of New England, Armidale, New South Wales  
9 2351, Australia

10 \*Correspondence: [hnonheb2@une.edu.au](mailto:hnonheb2@une.edu.au)

11 **ORCID IDs**

12 MRK 0000-0002-8115-7725, HN 0000-0001-9055-3095

13 **Acknowledgements**

14 The authors are grateful to Kirsten Drew for the analysis of IAA. The authors also  
15 acknowledge the Australian Government for providing a Research Training Program (RTP)  
16 PhD scholarship to Muhammed Rezwan Kabir.

17

## 18 **Abstract**

19 The *THOUSAND-GRAIN WEIGHT 6* genes (*TaTGW6* and *OsTGW6*) are reported to result in  
20 larger grains of wheat and rice by reducing production of indole-3-acetic acid (IAA) in  
21 developing grains. However, a critical comparison of data on *TaTGW6* and *OsTGW6* with  
22 other reports on IAA synthesis in cereal grains requires that this hypothesis be reinvestigated.  
23 Here, we show that *TaTGW6* and *OsTGW6* are members of a large gene family that has  
24 undergone major, lineage-specific gene expansion. Wheat has nine genes, and rice three  
25 genes encoding proteins with more than 80% amino acid identity with *TGW6* making it  
26 difficult to envisage how a single inactive allele could have a major effect on IAA levels.  
27 *TGW6* is proposed to affect auxin levels by catalysing the hydrolysis of IAA-glucose (IAA-  
28 Glc). However, we show that developing wheat grains contain undetectable levels of ester  
29 IAA in comparison to free IAA and do not express an IAA-glucose synthase. Previous work  
30 on *TGW6*, reported maximal expression at 20 days after anthesis (DAA) in wheat and 2 DAA  
31 in rice. However, we show that neither gene is expressed in developing grains. Instead,  
32 *TaTGW6*, *OsTGW6* and their close homologues are exclusively expressed in pre-emergence  
33 inflorescences; *TaTGW6* is expressed particularly in microspores prior to mitosis. This  
34 combined with evidence for high levels of IAA production from tryptophan in developing  
35 grains demonstrates *TaTGW6* and *OsTGW6* cannot regulate grain size via the hydrolysis of  
36 IAA-Glc. Instead, their similarity to rice strictosidine synthase-like (*OsSTRL2*) suggests they  
37 play a key role in pollen development.

## 38 **Key words**

39 Auxin, grain weight, IAA-Glc, *OsSTRL2*, *TGW6*, wheat

## 40 **Declarations**

## 41 **Funding**

42 The research was supported by a Research Training Program (RTP) scholarship provided to  
43 Muhammed Rezwan Kabir by the Australian Government.

44

45 **Conflicts of interest**

46 The authors declare that they have no conflict of interests.

47 **Availability of data and material**

48 Not applicable

49 **Code availability**

50 Not applicable

51 **Key message**

52 Phylogenetic and expression analyses of grain weight genes *TaTGW6* and *OsTGW6*, and  
53 investigation of substrate availability indicate *TGW6* does not regulate auxin content of grains  
54 but may affect pollen development.

55

## 56 Introduction

57 Grain size is an important component of cereal yield and grain quality that has been the  
58 subject of extensive research in all cereals including wheat (Beral et al. 2020). This work has  
59 identified a large number of quantitative trait loci (QTLs) for grain weight in wheat (Kumar  
60 et al. 2019; Sukumaran et al. 2018), although most have not been fully validated and cloned.  
61 Nevertheless a number of candidate genes for grain size and grain weight have been reported  
62 and listed in reviews such as Cao et al. (2020), Gupta et al. (2020) and Li and Li (2016).  
63 Brinton and Uauy (2019) have argued the importance of rigorously confirming the  
64 mechanistic role of candidate genes within QTLs to establish they are directly responsible for  
65 influencing grain weight as well as to inform their interaction with other factors. A number of  
66 grain size and grain weight genes are associated with plant hormones including *TaCKX6-D1*,  
67 *TaTGW6-A1* and *TaTGW-7A* (Gupta et al. 2020). However, although plant hormones have  
68 been argued to play a major role in early grain development, the mechanism of their  
69 involvement is still largely unknown (Basunia and Nonhebel 2019). In particular, there are  
70 contradictory reports relating to the role of indole-3-acetic acid (IAA) in cereal grain  
71 development. Both, *TaTGW6* and *TaTGW-7A* are inactive alleles, reported to increase grain  
72 size by reducing the level of auxin in developing grains (Hu et al. 2016a; Hu et al. 2016b).  
73 This claim requires further investigation as other work suggests IAA production has a  
74 positive correlation with grain fill in wheat (Li et al. 2014; Shao et al. 2017). In other cereals,  
75 *Big grain1* increases rice grain size via its effect on auxin transport that results in increased  
76 IAA in the panicles (Liu et al. 2015). In addition, the rice *tillering and small grain 1 (tsg1)*  
77 mutant with reduced IAA biosynthesis has small grains (Guo et al. 2019) and the *defective*  
78 *endosperm18 (de18)* mutant of maize is specifically deficient in endosperm IAA production  
79 (Bernardi et al. 2012).

80 *TGW6* was first identified in rice following high resolution mapping of a major QTL  
81 for thousand-grain weight (TGW) using backcrossed inbred lines produced from Nipponbare  
82 and the Indian landrace Kasalath (Ishimaru et al. 2013). The authors noted a single open  
83 reading frame within the mapped location which had a single base pair deletion compared to  
84 the Nipponbare allele. Transformation of an RNAi construct for *TGW6* into Nipponbare and  
85 NIL(*TGW6*) confirmed that *TGW6* was responsible for the increased grain size. Expression  
86 analysis indicated that the gene was active in leaf tissue as well as the panicles, with  
87 maximum upregulation reported at 2 days after anthesis (DAA). The authors suggested the  
88 allele might increase grain length via effects on the timing of endosperm cellularisation and

89 noted that auxin may affect the timing of endosperm cellularisation. This combined with  
90 analysis of the amino acid sequence of TGW6 and molecular modelling studies led the  
91 authors to suggest that it might have IAA-glucose (IAA-Glc) hydrolase activity. This was  
92 confirmed using cloned Nipponbare TGW6. Supporting this result, the IAA content of grains  
93 at 3 DAA was reduced in the NIL(*TGW6*) compared to Nipponbare and auxin treatment of  
94 ovaries at the start of flowering reduced the endosperm length at 5 DAA. Ishimaru et al.  
95 (2013) thus appear to have built a strong case for the proposed role of TGW6. Later an  
96 orthologous gene *TaTGW6* was reported in wheat by Hu et al. (2016a). As was the case with  
97 rice, the null allele, *TaTGW6-c*, as well as a mutant allele, *TaTGW6-b* were associated with  
98 higher grain weight and lower IAA content of the grains. Nevertheless a closer look at both  
99 papers as well as consideration of major differences between them raises a number of key  
100 questions that need to be addressed.

101 Firstly, in order to have the reported effect on the IAA content of grains, the major  
102 source of IAA would have to be hydrolysis of the IAA-Glc conjugate rather than *de novo*  
103 synthesis from tryptophan via tryptophan aminotransferase (TAR) and indole-3-pyruvate  
104 monooxygenase (YUCCA). Neither Ishimaru et al. (2013) nor Hu et al. (2016a) investigated  
105 the availability of IAA-Glc as a substrate for TGW6. Furthermore, the TAR/YUCCA  
106 pathway of IAA production is strongly upregulated in rice from 4 DAA (Abu-Zaitoon et al.  
107 2012) and from 10 DAA in wheat (Kabir et al. 2020). The *TaTGW6* work has further  
108 problems in that the authors did not assess the activity of the gene product and the IAA  
109 measurements used inappropriate, low specificity methods (High performance liquid  
110 chromatography with UV absorbance detector). Hu et al. (2016a) also reported that *TaTGW6*  
111 was expressed much later in grain development, close to the end of the grain fill period at 20  
112 DAA. The differences in IAA content of grains were similarly detected late in grain  
113 development. Thus the wheat gene would have to affect grain size by a completely different  
114 mechanism. Finally, although Hu et al. (2016a) identified a large number of genes with high  
115 homology to *OsTGW6* in a combination of *Triticum Urartu* (source of wheat A genome),  
116 *Aegilops tauschii* (source of wheat D genome) and *Hordeum vulgare* (barley), they reported  
117 that in hexaploid wheat, only *TaTGW6* was associated with grain weight. It is unclear how a  
118 single inactive allele from a group of highly homologous genes could have a major effect on  
119 IAA content via hydrolysis of IAA-Glc.

120 We therefore set out to explore two major questions raised above in relation to  
121 *TaTGW6*. 1. How many *TaTGW6*-like genes are expressed in developing wheat grains? 2. Is

122 IAA-Glc present in developing wheat grains? We also investigated whether rice also has  
123 multiple *TGW6*-like genes. Finally, we set out to reinvestigate the timing and location of  
124 expression of *TGW6*-like genes in rice and wheat.

## 125 **Materials and methods**

### 126 **Bioinformatic analysis**

127 Wheat (*Triticum aestivum*) protein sequences homologous to OsTGW6, OsIAGLU,  
128 ZmIAGLU query sequences were downloaded from IWGSC RefSeq v1.1. via  
129 EnsemblPlants 47 (Kersey et al. 2015) following BlastP searches. Rice *TGW6*-like protein  
130 sequences were downloaded from Phytozome 12 (Goodstein et al. 2012). Phylogenetic  
131 analysis of protein sequences was carried out in MEGA7.0.26 (Kumar et al. 2016) using the  
132 Maximum Likelihood method (Jones et al. 1992). Multiple sequence alignment (MSA) were  
133 performed using MUSCLE (Edgar 2004). Bootstrap confidence levels were obtained using  
134 500 replicates (Felsenstein 1985). Evolutionary distances were computed using Poisson  
135 correction method (Zuckerkindl and Pauling 1965). Pairwise sequence alignment to  
136 determine amino acid identity was performed by EMBOSS Needle (Emery and Morgan  
137 2017). Global expression of *TaTGW6*-like genes and putative *TaIAGLU* genes was  
138 investigated using RNA sequencing (RNA-seq) data available in expVIP ([http://www.wheat-](http://www.wheat-expression.com)  
139 [expression.com](http://www.wheat-expression.com)). Rice RNA-seq data were obtained from Rice Genome Annotation Project  
140 (Kawahara et al. 2013).

### 141 **Plant materials**

142 Plants (Chinese Spring wheat variety *Triticum aestivum* L.) were grown in 20 cm × 20 cm  
143 pots under natural light at 23/14°C (day/night) in the glasshouse at the University of New  
144 England, Armidale, NSW. Pots were fertilized once a week with Thrive® (Yates, 1 g/L) from  
145 the initiation of tillering stage. Spikes were tagged when the first spikelet reached anthesis.  
146 Samples were collected from nine-day-old whole seedlings, pre-anthesis stages (40-50 mg),  
147 and at 5, 10, 15, 20 and 30 DAA from grains (70-90 mg). All samples were harvested at the  
148 same time each day (4:00 to 5:00 pm), then snap-frozen in liquid nitrogen and stored  
149 at -80°C. All analyses were carried out on at least three independent biological replicates  
150 harvested from different plants, on different days.

## 151 **RNA extraction and quantitative analysis**

152 Wheat grain samples were ground in liquid nitrogen and total RNA was extracted using  
153 Trizol (Invitrogen). RNA concentration and 260/280 ratio were determined using a  
154 NanoDrop ND-8000 Spectrophotometer (Thermo Scientific). RNA samples with  $A_{260/280}$  of  
155 1.8-2.0 were used for further analysis. The RNA quality was checked by agarose gel  
156 electrophoresis for two clear bands of 18S and 28S rRNAs (Nolan et al. 2006). Due to the  
157 large number of genes from each genome, 13 primer sets for *TaTGW6* and two for *TaIAGLU*  
158 were designed to amplify groups of highly similar genes as shown in Table S1. All melting  
159 points were in the range of 58–60°C and product sizes between 100–250 bp. Amplification  
160 was carried out using a One-Step RT-PCR Kit (QIAGEN) and BIO-RAD T100 Thermal  
161 Cyclor, with gel analysis to confirm a single product of the expected size. Controls with no  
162 reverse transcriptase and no template were included with each set of reactions. In addition,  
163 positive controls confirmed that primer sets were able to amplify DNA samples.

## 164 **Ester and free IAA measurement**

165 Wheat grain samples (70–90 mg) were ground in liquid nitrogen; 200  $\mu$ L of 65% isopropanol  
166 /35% 0.2 M pH 7.0 imidazole buffer (Chen et al. 1988) was then added with [ $^{13}\text{C}_6$ ] IAA  
167 internal standard (Cambridge Isotope Laboratories Inc.), and samples were extracted on ice  
168 for 1 h. Amounts of standard added varied with the age of samples; 16 ng of [ $^{13}\text{C}_6$ ] IAA was  
169 added to pre-anthesis samples and 78 ng of [ $^{13}\text{C}_6$ ] IAA was added to 20 and 30 DAA  
170 samples. Blank samples without plant tissue were taken through the entire extraction and  
171 analysis protocol to ensure that no contamination from the unlabelled IAA in the laboratory  
172 occurred.

173 Following extraction, samples were diluted with 1 mL deionized water and divided in  
174 two separate tubes. One portion from each extract was processed for ester IAA, the other for  
175 free IAA. An additional 0.5 mL deionized water was added to each tube, which was then  
176 centrifuged and the supernatant was transferred to fresh tubes. Ester IAA samples were  
177 transferred to 0.5 mL centrifugal filters, with 3 kDa molecular weight cut off (Amicon®  
178 Ultra, Merck Millipore Ltd.) to remove high molecular weight conjugates of IAA. 6M NaOH  
179 was added to a final concentration of 1 M and the sample hydrolysed for 1h at room  
180 temperature (Bandurski and Schulze 1977). Following hydrolysis the pH was adjusted to 3–  
181 3.5 by adding glacial acetic acid and samples kept on ice, prior to SPE clean-up. Strata C18-E

182 (55 $\mu$ m, 70A) columns were prewashed sequentially with 2 mL hexane, 2 mL methanol, 5 mL  
183 deionized water and 1 mL 1% acetic acid. Samples were loaded onto columns and washed 4  
184 times with 1 mL deionized water. IAA was eluted with 1 mL ACN and transferred to vials  
185 and stored at  $-20^{\circ}\text{C}$ . The remaining half samples were prepared for free IAA analysis as  
186 described by Kabir et al. (2020). The analysis of  $^{12}\text{C}:^{13}\text{C}$  IAA was conducted using a triple  
187 quadrupole Liquid Chromatograph Mass Spectrometer (LCMS)-8050, (Shimadzu) with  
188 XBridge<sup>TM</sup> C18 3.5  $\mu$ m, 2.1 $\times$ 50 mm column (Phenomenex). The chromatography solvent  
189 was 20% acetonitrile: 80% 0.01 M acetic acid at a flow rate of 0.2 mL/min. The nebulizing,  
190 heating and drying gas flow were 3 L/min, 10 L/min and 10 L/min, respectively. Interface  
191 temperature was  $300^{\circ}\text{C}$ , DL was  $250^{\circ}\text{C}$  and the heat block temperature was  $400^{\circ}\text{C}$ . The  
192 interface used a capillary voltage of 4 kV. The mass spectrometer was operated in multiple-  
193 reaction-monitoring mode (collision energy, 14.0 eV), transitions from  $m/z$  174.10 to 130.10  
194 for [ $^{12}\text{C}_6$ ] and  $m/z$  180.20 to 136.15 for [ $^{13}\text{C}_6$ ] were monitored. A series of standard mixtures  
195 of [ $^{13}\text{C}_6$ ] and unlabelled IAA in different ratios 10:1 to 1:10 were also assayed to confirm  
196 accuracy of quantitative analysis. Data were obtained from the average of two technical  
197 replicates first, then the average and the standard error of three biological replicates from  
198 each developmental stage.

## 199 **Results**

### 200 **Both wheat and rice have many TGW6-like proteins**

201 Our BlastP search of the wheat proteome (IWGSC RefSeq v1.1), using default parameters in  
202 EnsemblPlants, revealed 48 homologues with amino acid identities to TaTGW6 ranging from  
203 43.5 to 98.8%. Their encoding genes are listed in Table 1. Most of the genes (34 out of 48)  
204 are found in clusters of tandem repeats in which some genes have truncated sequences,  
205 encoding proteins of approximately 200 amino acids compared to TaTGW6 which has 345  
206 amino acids. The chromosomal location of five genes including *TaTGW6* is listed as  
207 unknown even though this gene was originally identified from a QTL on chromosome 4A. To  
208 investigate whether rice also has multiple TGW6-like proteins, a BlastP search of the rice  
209 proteome was then carried out. This discovered 11 homologues of OsTGW6 with 45.4-92.0%  
210 amino acid identity, encoded by genes listed in Table 2. Similar to the wheat *TGW6*-like  
211 genes, 10 are found in four tandem clusters and two are truncated sequences.



212 The protein phylogenetic tree in Fig. 1 shows the relationships between wheat and  
213 rice *TGW6* homologues. This divides into three major clades; the largest clade (clade I)  
214 contains 27 wheat and six rice proteins with greater than 57% amino acid identity to  
215 *TaTGW6* and *OsTGW6*, respectively. Within clade I, wheat and rice proteins form separate  
216 branches. The largest branch contains *TaTGW6* plus 13 wheat homologues. Five of these  
217 have truncated sequences, but there appear to be eight full-length proteins with over 80%  
218 amino acid identity to *TaTGW6*. At least 10 proteins are encoded by genes located in clusters  
219 of tandem repeats. An additional small branch in clade I has three proteins with  
220 approximately 74% amino acid identity to *TaTGW6*, all encoded on chromosome 3. The final  
221 wheat branch in clade I has 11 proteins with 57.5-74.2% amino acid identity to *TaTGW6*.  
222 The rice proteins are divided into two branches, each encoded by a cluster of tandemly  
223 repeated genes. The cluster on chromosome 6 includes *OsTGW6* as well as two additional  
224 genes encoding proteins with at least 84% amino acid identity to *OsTGW6*. We also noted  
225 that all rice genes encoding proteins in clade I and also most wheat genes in this clade had no  
226 introns (Table 1 and 2).

227 Clade II contains 14 wheat and three rice proteins with 46-50% amino acid identity to  
228 *TaTGW6* and *OsTGW6*. Clade III has seven full length wheat and two rice proteins. These  
229 have between 43-48% amino acid identity to *TaTGW6* and *OsTGW6*. The genes encoding  
230 proteins in clades II and III are also primarily found in groups of tandem repeats in both  
231 wheat and rice.

### 232 ***TaTGW6*, *OsTGW6* and their clade I homologues are expressed in early** 233 **inflorescence not in developing grains**

234 Following reports that *TaTGW6* has maximum expression at 20 DAA whereas *OsTGW6* has  
235 highest expression at 2 DAA, we examined the expression of *TaTGW6* and 19 of its close  
236 homologues in clade I during grain development up to 20 DAA by reverse transcriptase PCR.  
237 Due to the very high homology within this large group of genes, primers were designed to  
238 amplify groups of similar genes as shown in Supplementary Table S1. Three separate primer  
239 sets including those from Hu et al. (2016a) were used for *TaTGW6* and its three closest  
240 homologues. Nevertheless no amplification was found from RNA samples derived from grain  
241 samples of any age. Poor RNA quality as well as non-functional primer sets were both ruled  
242 out as causes of the negative results via successful amplification of other IAA biosynthesis  
243 genes (*TAR* and *YUCCA*) and successful amplification from DNA template.

244 To further investigate the unexpected lack of expression in developing grains of  
245 wheat, we first investigated microarray data from PLEXdb (Dash et al. 2011) then RNA-seq  
246 data via expVIP for more information on gene expression. The RNA-seq database in  
247 particular has samples from many different tissues and experiments. Fig. 2 summarises  
248 information on the expression of *TaTGW6* and the 48 homologues listed in Table 1,  
249 throughout the plant from Chinese Spring samples, with genes organized by clade. These data  
250 confirm neither *TaTGW6* nor any of its clade I homologues have any expression in grains or  
251 in leaves or roots. Instead, *TaTGW6* and several *TaTGW6*-like genes show highly restricted  
252 expression only in the early inflorescence. In this tissue, highest expression was found for  
253 *TaTGW6*, TraesCS7D02G139900, TraesCS7D02G140500 and TraesCS7B02G040900. Most  
254 genes in clade II also have the same expression profile restricted to early inflorescence  
255 development. On the other hand, genes in clade III have three different expression patterns:  
256 TraesCS5B02G195400 and TraesCS5D02G202800 are expressed in a wider range of spike  
257 samples including anthers; TraesCS5B02G195300 and TraesCS5D02G202700 are  
258 upregulated in leaf tissue and young grains (2 DAA); TraesCS7D02G076300 is expressed in  
259 the stem and flag leaf. Only a single gene from clade II, TraesCSU02G189700, had any  
260 detectable expression in grains at 20 DAA and the highest expression of this gene was in the  
261 early inflorescence samples as for other clade II genes. We confirmed the expression of these  
262 clade II and III genes in nine-day-old seedling leaf, stamen and pistil, and 20 DAA in grains  
263 by RT-PCR. Additionally, our experimental data showed that mRNA for clade III genes,  
264 TraesCS5B02G195300 and TraesCS5D02G202700 is present in grains up to 5 DAA.  
265 However, we did not detect amplification of *TaTGW6* or its close homologues in RNA from  
266 these tissues.

267 As these results differ radically from the published data, we also investigated the  
268 expression of *OsTGW6* and its homologues from rice, using microarray and RNA-seq  
269 databases. The RNA-seq results are presented in Fig. 3; both data sets confirmed that like  
270 *TaTGW6*, the rice gene, as well as its closest homologues on chromosome 6, is expressed  
271 only in the pre-emergent inflorescence. No expression was detected in grain samples. Other  
272 clade I genes on chromosome 7 are expressed both in the pre-emergent inflorescence as well  
273 as in anthers. The clade II genes on chromosome 8 are also expressed in pre-emergent  
274 inflorescence similar to their wheat orthologues. Only one gene in clade III,  
275 LOC\_Os09g20684 is expressed in multiple tissues, particularly shoots. This gene appears to

276 be orthologous to TraesCS5B02G195300 and TraesCS5D02G202700 (see Fig. 1) which have  
277 a similar expression profile.

### 278 **Expression of *TaTGW6*-like genes varies between varieties and is similar to** 279 **that of *OsSTRL2***

280 We noted a report in the literature that a more distant homologue of *TGW6* in rice,  
281 strictosidine synthase-like (*OsSTRL2*) (Zou et al. 2017), is also expressed in the pre-emergent  
282 inflorescence, specifically in the tapetum and microspores, and is required for normal pollen  
283 development. The expVIP data enabled us to compare expression of *TaTGW6*-like genes as  
284 well as the wheat orthologues of *OsSTRL2* (encoded by TraesCS4B02G215300,  
285 TraesCS4D02G215800, and TraesCS4A02G089000, Table 3) in Chinese Spring, other wheat  
286 varieties and in more specific microspore samples. Fig. 4 shows that *TaTGW6*, eight of its  
287 close homologues as well as the wheat orthologues of *OsSTRL2* are all expressed in  
288 microspores at the late vacuolated uninucleate stage, prior to mitosis. We noted that,  
289 *TaTGW6* and two other genes are more highly expressed than the putative *TaSTRL* genes. In  
290 addition, expression of *TaTGW6*-like genes varies between the four varieties for which data  
291 are available. *TaTGW6* itself appears not to be expressed in the variety Azhurnaya. However,  
292 the close homologue TraesCS3B02G559100 is expressed in these plants. The description of  
293 developmental stages varies between studies. However, *TaTGW6*-like gene activity appears  
294 to be restricted to full boot/spike “flag leaf stage” and is downregulated as the spike emerges  
295 from the boot. Expression of the *TaSTRL* genes is highest in the same samples, but continues  
296 a little later during spike emergence. However, *TaSTRL* genes are completely downregulated  
297 by anthesis.

### 298 **Investigation of existence and production of IAA-Glc in wheat grains**

299 In the second part of the study, we investigated evidence for IAA-Glc (the proposed substrate  
300 of *TGW6*) as well as expression of genes (*IAGLU*) required for its production from IAA. A  
301 BlastP search of the wheat proteome with rice and maize *IAGLU* revealed a total of 38  
302 homologous proteins. These form a large diverse family of UDP-glycosyltransferases (UGT)  
303 most of which have less than 50% amino acid identity to the query sequences. However, five  
304 proteins have 58.1-62.2% amino acid sequence identity to *OsIAGLU* and *ZmIAGLU* (Table  
305 4) and are therefore putative *TaIAGLU*s. The phylogenetic tree of *OsIAGLU*, *ZmIAGLU* and  
306 their wheat homologues, rooted with the most similar homologue from rice, an

307 uncharacterised putative UDP-glucosyl transferase (Fig. 5) indicates that the wheat sequences  
308 are likely to be conserved orthologues of *OsiAGLU* and *ZmiAGLU*.

309 *OsiAGLU* and *ZmiAGLU* expression has been reported in seedlings and in endosperm  
310 at 18 DAA, respectively. Thus we investigated *TaAGLU* expression during grain  
311 development and in young seedlings by RT-PCR. However, we failed to detect any transcript  
312 for *TaAGLU* genes in any sample. These results in combination with RNA-seq data (not  
313 shown), indicate that *TaAGLU* is not expressed in developing grains or in the inflorescence.

314 To confirm the lack of availability of IAA-Glc as substrate for any hydrolase, we  
315 extracted and analysed low molecular weight ester IAA in young developing spikes as well as  
316 in grains at 20 and 30 DAA. Free IAA was found in all samples; pre-anthesis spikes (0.14  
317  $\mu\text{g/g}$  FW), 20 DAA (1.3  $\mu\text{g/g}$  FW) and 30 DAA (0.57  $\mu\text{g/g}$  FW). However, the amounts of  
318 IAA in samples that had been subjected to hydrolyse were the same as the free IAA values.  
319 Thus the bulk of IAA in all samples was free IAA, with very little low molecular weight ester  
320 IAA such as IAA-Glc.

321 Finally we also investigated whether wheat has any potential orthologues of  
322 UGT84B1, an UDP-glucose:indole-3-acetic acid glucosyltransferase from Arabidopsis  
323 encoded by AT2G23260. The BlastP search indicated that glucosyl transferases in wheat, as  
324 well as in rice and maize, have a maximum of 34% amino acid homology to UGT84B1 (data  
325 not shown) indicating that cereals do not have a conserved orthologue of this protein.

## 326 **Discussion**

### 327 ***TaTGW6* and *OsTGW6* are part of a large gene family**

328 In this study, we set out to re-evaluate the hypothesis that *TaTGW6* and *OsTGW6* affect grain  
329 size via their effects on IAA production in developing grains. In light of the hexaploid nature  
330 of wheat, we considered it surprising that single non-functional allele encoding an IAA-Glc  
331 hydrolase could have a measurable effect on IAA content and grain size. In addition, Hu et al.  
332 (2016a) had previously reported 95 sequences with high similarity to *TaTGW6* in a  
333 combination of wheat progenitor species and barley. We therefore investigated how many  
334 *TaTGW6*-like genes are present in the wheat genome and also expressed in developing wheat  
335 grains.

336 The BlastP search and subsequent phylogenetic analysis identified 48 homologues of  
337 *TaTGW6*, with most located in clusters of tandem repeats on particular chromosomes. A  
338 similar situation occurs in rice, in which *OsTGW6* and six close homologues are located in  
339 two clusters on chromosomes 6 and 7. The clusters of tandem repeats were most prevalent in  
340 clade I. In addition, most clade I genes had no introns. Finally we noted that although each  
341 clade contained proteins from both wheat and rice, branches in clades I and II contained  
342 proteins from a single species. All observations suggest that *TGW6*-like genes have  
343 undergone rapid and recent gene expansion.

344 This lineage-specific gene expansion is unexpected in a gene family involved in  
345 hormone regulation. Additionally, the existence of eight genes encoding proteins with more  
346 than 80% amino acid homology to *TaTGW6* (two have above 95% identity), suggests that a  
347 single inactive allele is not likely to have a major effect on IAA content, unless only *TaTGW6*  
348 is expressed in grains. Similarly, rice has two genes on chromosome 6, encoding proteins  
349 with more than 84% amino acid homology to *OsTGW6*, suggesting that like wheat, a single  
350 non-functional allele in rice would be unlikely to have a significant impact on the IAA  
351 content of grains unless only *OsTGW6* is expressed.

### 352 **Expression data cast doubt on role of *TGW6* in grains**

353 Although Hu et al. (2016a) found highest expression of *TaTGW6* at 20 DAA in grains and  
354 reported no effect of the inactive allele on IAA content of younger grains, the rice gene is  
355 reported to exert its effect on IAA levels at only 2 DAA. In addition, we have argued above  
356 that a single inactive allele could only reduce grain IAA content if its close homologues are  
357 not expressed in grains. Therefore, it was essential to confirm which *TGW6*-like genes are  
358 expressed and in what tissues and stage of development. To our surprise, we were not able to  
359 amplify transcripts of any genes in clade I, even with the use of primers from the Hu et al.  
360 (2016a) publication. Careful checking of these results included confirming the efficacy of  
361 primers with DNA as well as our ability to amplify clade III transcripts from the same RNA  
362 samples. The lack of expression in grains at any age was then confirmed using microarray  
363 and RNA-seq data as this became available. The RNA-seq data demonstrated that expression  
364 of *TaTGW6* is restricted to pre-emergent spike tissue. Close homologues of *TaTGW6* were  
365 also expressed in the same tissues. Subsequent examination of transcript information for rice  
366 genes confirmed the same situation. *OsTGW6* is not expressed in grain samples; instead,  
367 *OsTGW6* as well as all clade I homologues are also expressed in the pre-emergent

368 inflorescence. Thus our results show that published data from Ishimaru et al. (2013) and Hu  
369 et al. (2016a) on expression of both *OsTGW6* and *TaTGW6* appear to be incorrect and that  
370 restricted expression of *TGW6* in the pre-emergent inflorescence is conserved across the two  
371 cereal species. We note that as neither *TaTGW6* nor *OsTGW6* have introns, extreme care  
372 needs to be taken to avoid any DNA contamination of RNA samples used for RT-PCR and to  
373 include no reverse transcriptase controls in all work. Our findings indicate that *TGW6* in  
374 neither species can play a direct role in the production of IAA in developing grains and that  
375 some other explanation should be sought to explain any effect on grain size.

376 A more detailed examination of expression of *TaTGW6* and its close homologues in  
377 different wheat varieties confirmed the restricted expression to pre-emergent inflorescence  
378 and also suggested that expression occurs in the microspores prior to mitosis. Whether  
379 expression is specifically restricted to microspores requires further investigation. However,  
380 the extensive species-specific gene expansion, expression restricted to a particular stage of  
381 pollen development as well as variable expression of different *TGW6*-like genes between  
382 wheat varieties all point to a possible role of this gene group in pollen development or  
383 possibly reproductive compatibility. We then came across a publication on a more distant  
384 homologue of *OsTGW6*, *strictosidine synthase-like*, *OsSTRL2*, (Zou et al. 2017). Although  
385 *OsSTRL2* has only 34.6% amino acid identity with *OsTGW6*, it is expressed at the same  
386 stage of development. In addition, Zou et al. (2017) showed that expression was restricted to  
387 the tapetum and microspores; furthermore knockout of *OsSTRL2* resulted in male sterility.  
388 The mutation had no observable effect until stage 9 of pollen development (early microspore  
389 development), after which the microspores became wrinkled and shrunken indicating a key  
390 role for *OsSTRL2* at this very specific stage of pollen development. Zou et al. (2017) also  
391 listed all members of the *strictosidine synthase-like* family, including *OsTGW6* which they  
392 designated as *OsSTRL7*. No connection was made to the *TGW6* gene and the work by  
393 Ishimaru et al. (2013). They did however note, from mined RNA-seq data, that *OsSTRL5*,  
394 *OsSTRL6* and *OsSTRL7* (LOC\_Os06g41820, LOC\_Os06g41830 and LOC\_Os06g41850)  
395 showed a similar expression pattern to *OsSTRL2*, though the signal was much weaker. In  
396 contrast, we noted that in the more specific microspore samples represented in the wheat  
397 RNA-seq database, *TaTGW6* was more highly expressed than *TaSTRL* genes. The *TaSTRL*  
398 genes were however expressed for a longer duration than *TaTGW6*. In summary, these data  
399 provide circumstantial evidence that *TGW6* in wheat and rice may play a similar role in  
400 pollen development to *OsSTRL2*.

## 401 **IAA-Glc is not present or produced in developing wheat grains**

402 The second question addressed by this study was: is IAA-Glc present in developing wheat  
403 grains? *TGW6* was reported to affect the auxin content of grains via IAA-Glc hydrolase  
404 activity. However, the existence of IAA-Glc was not investigated by either Ishimaru et al.  
405 (2013) or Hu et al. (2016a). Nevertheless mature seeds of several cereals including wheat are  
406 known to store IAA as ester conjugates with carbohydrates (Bandurski and Schulze 1977);  
407 these are hydrolysed to serve as a source of IAA during germination (Epstein et al. 1980).  
408 Ester conjugates of IAA have been extensively studied in maize, where the bulk are high  
409 molecular weight esters or esters of *myo*-inositol (Cohen and Bandurski 1982). Immature  
410 maize kernels are a rich source of IAA:UDP-glucose transferase enzyme activity; although,  
411 the resulting IAA-Glc is then transacetylated to *myo*-inositol (Cohen and Bandurski 1982). In  
412 addition, the *IAGLU* genes encoding this enzyme have been characterised from maize and  
413 rice, (Choi et al. 2012; Szerszen et al. 1994). As a prelude to analysis of IAA-Glc from  
414 developing wheat grains, we first assayed low molecular weight IAA ester conjugates via a  
415 well-established hydrolysis method. The comparison between free IAA and hydrolysed low  
416 molecular weight ester IAA indicated that the amount of the latter was negligible in  
417 comparison to free IAA. In addition, an exhaustive search for expression of the wheat  
418 orthologues of *IAGLU* was unable to detect gene activity in developing grains and other  
419 tissues. In contrast, our recent work on the *TAR/YUCCA* pathway showed this was highly  
420 active in developing wheat grains from 10 to 20 DAA (Kabir et al. 2020) similar to  
421 previously published work on rice (Abu-Zaitoon et al. 2012). Expression of *TaTAR2.3-1B*,  
422 *TaYUC9-1* and *TaYUC10* was strongly correlated with the free IAA content of developing  
423 wheat grains. We therefore conclude that *de novo* synthesis from tryptophan rather than  
424 hydrolysis of IAA-Glc is the major source of IAA during wheat grain development.

## 425 **Conclusion**

426 Although *TaTGW6* and *OsTGW6* are widely cited to affect grain size in wheat and rice via  
427 their effects on IAA-Glc hydrolysis, we have demonstrated that neither gene is expressed in  
428 developing grains. In addition, the proposed substrate, IAA-Glc is not present in grains and  
429 the gene for its formation is not expressed in grains or spike tissue. We conclude that like  
430 maize, the IAA content of developing wheat grains is controlled by the expression of *TAR*  
431 and *YUCCA* genes. *TaTGW6* and *OsTGW6* are part of a large gene family that has undergone  
432 recent gene expansion, with many close homologues present in both species. *TGW6* and

433 *TGW6*-like genes are expressed exclusively in the pre-emergent inflorescence of both wheat  
434 and rice. In wheat, expression occurs in the microspores prior to mitosis. Gene expression is  
435 closely similar to the homologous *OsSTRL2* and its wheat orthologues. We therefore suggest  
436 that *TaTGW6* and *OsTGW6* are most likely to play a role in pollen development.

#### 437 **Author contribution statement**

438 MRK and HMN conceived and designed the research. MRK performed all the experiments.  
439 MRK and HMN wrote the manuscript. Both authors read and approved the manuscript.

440

#### **References**

- Abu-Zaitoon YM, Bennett K, Normanly J, Nonhebel HM (2012) A large increase in IAA during development of rice grains correlates with the expression of tryptophan aminotransferase *OsTARI* and a grain-specific *YUCCA*. *Physiologia Plant* 146:487–499
- Bandurski RS, Schulze A (1977) Concentration of indole-3-acetic acid and its derivatives in plants. *Plant Physiol* 60:211–213
- Basunia MA, Nonhebel HM (2019) Hormonal regulation of cereal endosperm development with a focus on rice (*Oryza sativa*). *Funct Plant Biol* 46:493–506
- Beral A, Rincant R, Le Gouis J, Girousse C, Allard V (2020) Wheat individual grain-size variance originates from crop development and from specific genetic determinism. *PloS One* 15:e0230689
- Bernardi J, Lanubile A, Li QB, Kumar D, Kladnik A, Cook SD, Ross JJ, Marocco A, Chourey PS (2012) Impaired auxin biosynthesis in the *defective endosperm18* mutant is due to mutational loss of expression in the *ZmYuc1* gene encoding endosperm-specific YUCCA1 protein in maize. *Plant Physiol* 160:1318–1328
- Brinton J, Uauy C (2019) A reductionist approach to dissecting grain weight and yield in wheat. *J Intgr Plant Biol* 61:337–358
- Cao J, Li G, Qu D, Li X, Wang Y (2020) Into the seed: auxin controls seed development and grain yield. *Int J Mol Sci* 21:1662
- Chen KH, Miller AN, Patterson GW, Cohen JD (1988) A rapid and simple procedure for purification of indole-3-acetic acid prior to GC-SIM-MS analysis. *Plant Physiol* 86:822–825



- Choi MS, Koh EB, Woo MO, Piao R, Oh CS, Koh HJ (2012) Tiller formation in rice is altered by overexpression of *OsIAGLU* gene encoding an IAA-conjugating enzyme or exogenous treatment of free IAA. *J Plant Biol* 55:429–435
- Choulet F, Alberti A, Theil S, Glover N, Barbe V, Daron J, Pingault L, Sourdille P, Couloux A, Paux E, Leroy P, Mangenot S, Guilhot N, Gouis JL, Balfourier F, Alaux M, Jamilloux V, Poulain J, Durand C, Bellec A, Gaspin C, Safar J, Dolezel J, Rogers J, Vandepoele K, Aury J-M, Mayer K, Berges H, Quesneville H, Wincker P, Feuillet C (2014) Structural and functional partitioning of bread wheat chromosome 3B. *Science* 345:1249721
- Cohen JD, Bandurski RS (1982) Chemistry and physiology of the bound auxins. *Ann Rev Plant Physiol* 33:403–430
- Dash S, Van Hemert J, Hong L, Wise RP, Dickerson JA (2011) PLEXdb: gene expression resources for plants and plant pathogens. *Nucleic Acids Res* 40:D1194–D1201
- Edgar RC (2004) MUSCLE: multiple sequence alignment with high accuracy and high throughput. *Nucleic Acids Res* 32:1792–1797
- Emery LR, Morgan SL (2017) The application of project-based learning in bioinformatics training. *PLoS Comput Biol* 13:e1005620
- Epstein E, Cohen JD, Bandurski RS (1980) Concentration and metabolic turnover of indoles in germinating kernels of *Zea mays* L. *Plant Physiol* 65:415–421
- Felsenstein J (1985) Confidence limits on phylogenies: an approach using the bootstrap. *Evolution* 39:783–791
- Goodstein DM, Shu S, Howson R, Neupane R, Hayes RD, Fazo J, Mitros T, Dirks W, Hellsten U, Putnam N, Rokhsar DS (2012) Phytozome: a comparative platform for green plant genomics. *Nucleic Acids Res* 40:D1178–D1186
- Guo T, Chen K, Dong NQ, Ye WW, Shan JX, Lin HX (2019) *Tillering and small grain 1* dominates the tryptophan aminotransferase family required for local auxin biosynthesis in rice. *J Integr Plant Biol* 62:581–600
- Gupta PK, Balyan HS, Sharma S, Kumar R (2020) Genetics of yield, abiotic stress tolerance and biofortification in wheat (*Triticum aestivum* L.). *Theor Appl Genet* 133:1569–1602
- Hu MJ, Zhang HP, Cao JJ, Zhu XF, Wang SX, Jiang H, Wu ZY, Lu J, Cheng C, Sun GL, Ma CX (2016a) Characterization of an IAA-glucose hydrolase gene *TaTGW6* associated with grain weight in common wheat (*Triticum aestivum* L.). *Mol Breed* 36:1–11

- Hu MJ, Zhang HP, Liu K, Cao JJ, Wang SX, Jiang H, Wu ZY, Lu J, Zhu XF, Xia XC, Sun GL, Ma CX, Chang C (2016b) Cloning and characterization of *TaTGW-7A* gene associated with grain weight in wheat via SLAF-seq-BSA. *Front Plant Sci* 7:1902
- Ishimaru K, Hirotsu N, Madoka Y, Murakami N, Hara N, Onodera H, Kashiwagi T, Ujiie K, Shimizu B, Onishi A, Miyagawa H, Katoh E (2013) Loss of function of the IAA-glucose hydrolase gene *TGW6* enhances rice grain weight and increases yield. *Nature Genet* 45:707–711
- Jones DT, Taylor WR, Thornton JM (1992) The rapid generation of mutation data matrices from protein sequences. *Bioinformatics* 8:275–282
- Kabir MR, Backhouse D, Winter G, Nonhebel HM (2020) Expression of *TaTAR2.3-1B*, *TaYUC9-1* and *TaYUC10* correlates with auxin and starch content of developing wheat grains. *bioRxiv*. <https://doi.org/10.1101/2020.10.12.336560>
- Kawahara Y, Bastide M, Hamilton JP, Kanamori H, McCombie WR, Ouyang S, Schwartz DC, Tanaka T, Wu J, Zhou J, Childs KL, Davidson RM, Lin H, Quesada-Ocampo L, Vaillancourt B, Sakai H, Lee SS, Kim J, Numa H, Itoh T, Buell CR, Matsumoto T (2013) Improvement of the *Oryza sativa* Nipponbare reference genome using next generation sequence and optical map data. *Rice* 6:4
- Kersey PJ, Allen JE, Armean I, Boddu S, Bolt BJ, Carvalho-Silva D, Christensen M, Davis P, Falin LJ, Grabmueller C, Humphrey J, Kerhornou A, Khobova J, Aranganathan NK, Langridge N, Lowy E, McDowall MD, Maheswari U, Nuhn M, Ong CK, Overduin B, Paulini M, Pedro H, Perry E, Spudich G, Tapanari E, Walts B, Williams G, Tello-Ruiz M, Stein J, Wei S, Ware D, Bolser DM, Howe KL, Kulesha E, Lawson D, Maslen G, Staines DM (2015) Ensembl Genomes 2016: more genomes, more complexity. *Nucleic Acids Res* 44:D574–D580
- Kumar A, Mantovani EE, Simsek S, Jain S, Elias EM, Mergoum M (2019) Genome wide genetic dissection of wheat quality and yield related traits and their relationship with grain shape and size traits in an elite × non-adapted bread wheat cross. *PloS One* 14:e0221826
- Kumar S, Stecher G, Tamura K (2016) MEGA7: Molecular Evolutionary Genetics Analysis version 7.0 for bigger datasets. *Mol Biol Evol* 33:1870–1874
- Li N, Li Y (2016) Signaling pathways of seed size control in plants. *Curr Opin Plant Biol* 33:23–32
- Li N, Yin N, Niu Z, Hui W, Song J, Huang C, Wang H, Kong L, Febg D (2014) Isolation and characterization of three *TaYUC10* genes from wheat. *Gene* 546:187–194

- Liu L, Tong H, Xiao Y, Che R, Xu F, Hu B, Liang C, Chu J, Li J, Chu C (2015) Activation of *Big Grain1* significantly improves grain size by regulating auxin transport in rice. *Proc Natl Acad Sci* 112:11102–11107
- Nolan T, Hands RE, Bustin SA (2006) Quantification of mRNA using real-time RT-PCR. *Nat Protoc* 1:1559–1582
- Nonhebel HM, Griffin K (2020) Production and roles of IAA and ABA during development of superior and inferior rice grains. *Funct Plant Biol* 47:716–726
- Ramírez-González RH, Borrill P, Lang D, Harrington SA, Brinton J, Venturini L, Davey M, Jacobs J, Ex F, Pasha A, Khedikar Y, Robinson SJ, Cory AT, Florio T, Concia L, Juery C, Schoonbeek H, Steuernagel B, Xiang D, Ridout CJ, Chalhoub B, Mayer KFX, Benhamed M, Latrasse D, Bendahmane A, International Wheat Genome Sequencing Consortium, Wulff BBH, Appels R, Tiwari V, Datla R, Choulet F, Pozniak CJ, Provart NJ, Sharpe AG, Paux E, Spannagl M, Bräutigam A, Uauy C (2018) The transcriptional landscape of polyploid wheat. *Science* 361:eaar6089
- Seifert F, Bössow S, Kumlehn J, Gnad H, Scholten S (2016) Analysis of wheat microspore embryogenesis induction by transcriptome and small RNA sequencing using the highly responsive cultivar “Svilena”. *BMC Plant Biol* 16:97
- Shao A, Ma W, Zhao X, Hu M, He X, Teng W, Li H, Tong Y (2017) The auxin biosynthetic *TRYPTOPHAN AMINOTRANSFERASE RELATED TaTAR2.1-3A* increases wheat grain yield. *Plant Physiol* 174:2274–2288
- Sukumaran S, Lopes M, Dreisigacker S, Reynolds M (2018) Genetic analysis of multi-environmental spring wheat trials identifies genomic regions for locus-specific trade-offs for grain weight and grain number. *Theor Appl Genet* 131:985–998
- Szerszen JB, Szczyglowski K, Bandurski RS (1994) *iaglu*, a gene from *Zea mays* involved in conjugation of growth hormone indole-3-acetic acid. *Science* 265:1699–1701
- Zou T, Li S, Liu M, Wang T, Xiao Q, Chen D, Li Q, Liang Y, Zhu J, Liang Y, Deng Q, Wang S, Zheng A, Wang L, Li P (2017) An atypical strictosidine synthase, OsSTRL2, plays key roles in anther development and pollen wall formation in rice. *Sci Rep* 7:6863
- Zuckerkindl E, Pauling L (1965) Evolutionary divergence and convergence in proteins. In: Bryson V, Vogel HJ (eds) *Evolving genes and proteins*. Academic Press, New York, pp 97–166

**Table 1** List of TaTGW6 homologues including locus ID and location, size of gene product, amino acid identity to TaTGW6 and number of introns. Amino acid identity was compared using Emboss Needle

| Clade              | Gene ID (IWGSC RefSeq v1.1) | Amino acids        | Percent amino acid ID with TaTGW6 | Chromosome | Introns |   |
|--------------------|-----------------------------|--------------------|-----------------------------------|------------|---------|---|
| I                  | TraesCSU02G223800/TaTGW6    | 345                | 100.0                             | U          | none    |   |
|                    | TraesCSU02G255900           | 189                | 97.4                              | U          | none    |   |
|                    | TraesCSU02G240600           | 189                | 96.8                              | U          | none    |   |
|                    | TraesCS1A02G026500          | 345                | 98.8                              | 1A         | none    |   |
|                    | TraesCS7D02G075900          | 345                | 98.0                              | 7D         | none    |   |
|                    | TraesCS7D02G076000          | 341                | 96.5                              | 7D         | none    |   |
|                    | TraesCS7D02G076500          | 190                | 95.3                              | 7D         | none    |   |
|                    | TraesCS7D02G076600          | 209                | 96.2                              | 7D         | none    |   |
|                    | TraesCS3A02G496900          | 350                | 85.0                              | 3A         | none    |   |
|                    | TraesCS3A02G496700          | 345                | 84.4                              | 3A         | none    |   |
|                    | TraesCS3B02G559100          | 345                | 83.9                              | 3B         | none    |   |
|                    | TraesCS3B02G558800          | 209                | 86.6                              | 3B         | none    |   |
|                    | TraesCS3D02G504000          | 345                | 85.3                              | 3D         | none    |   |
|                    | TraesCS3D02G503900          | 311                | 80.5                              | 3D         | none    |   |
|                    | TraesCS3B02G338500          | 343                | 74.2                              | 3B         | none    |   |
|                    | TraesCS3A02G298200          | 317                | 73.8                              | 3A         | none    |   |
|                    | TraesCS3D02G303900          | 320                | 73.4                              | 3D         | none    |   |
|                    | TraesCS2B02G281700          | 344                | 67.7                              | 2B         | none    |   |
|                    | TraesCSU02G104000           | 348                | 68.4                              | U          | none    |   |
|                    | TraesCS7A02G138800          | 305                | 59.4                              | 7A         | 1       |   |
|                    | TraesCS7A02G138700          | 209                | 73.2                              | 7A         | none    |   |
|                    | TraesCS7A02G138300          | 209                | 74.2                              | 7A         | none    |   |
|                    | TraesCS7D02G139900          | 348                | 67.0                              | 7D         | none    |   |
|                    | TraesCS7D02G140000          | 348                | 68.4                              | 7D         | none    |   |
|                    | TraesCS7D02G140500          | 345                | 67.8                              | 7D         | none    |   |
|                    | TraesCS7D02G140600          | 307                | 57.5                              | 7D         | 1       |   |
|                    | TraesCS7B02G040400          | 348                | 67.2                              | 7B         | 1       |   |
|                    | TraesCS7B02G040900          | 348                | 67.5                              | 7B         | none    |   |
|                    | II                          | TraesCS3A02G256600 | 336                               | 50.4       | 3A      | 3 |
|                    |                             | TraesCS3B02G289800 | 336                               | 50.4       | 3B      | 2 |
| TraesCS3D02G256900 |                             | 336                | 47.6                              | 3D         | 2       |   |
| TraesCS5B02G382800 |                             | 341                | 48.1                              | 5B         | 2       |   |
| TraesCS5B02G383000 |                             | 339                | 48.1                              | 5B         | 2       |   |
| TraesCS5D02G389100 |                             | 355                | 46.0                              | 5D         | 2       |   |

|     |                    |     |      |    |   |
|-----|--------------------|-----|------|----|---|
|     | TraesCS2A02G078000 | 343 | 48.3 | 2A | 1 |
|     | TraesCS2B02G093000 | 343 | 48.0 | 2B | 1 |
|     | TraesCS2B02G092900 | 342 | 48.6 | 2B | 1 |
|     | TraesCS2D02G076000 | 343 | 48.0 | 2D | 1 |
|     | TraesCS2D02G076200 | 343 | 48.0 | 2D | 1 |
|     | TraesCS2D02G076300 | 346 | 46.8 | 2D | 1 |
|     | TraesCS2D02G076400 | 343 | 47.7 | 2D | 1 |
|     | TraesCSU02G189700  | 343 | 47.7 | U  | 1 |
| III | TraesCS5A02G188200 | 363 | 46.1 | 5A | 2 |
|     | TraesCS5A02G188300 | 377 | 43.5 | 5A | 1 |
|     | TraesCS5B02G195300 | 346 | 48.3 | 5B | 2 |
|     | TraesCS5B02G195400 | 364 | 47.9 | 5B | 2 |
|     | TraesCS5D02G202700 | 346 | 48.2 | 5D | 2 |
|     | TraesCS5D02G202800 | 364 | 46.8 | 5D | 2 |
|     | TraesCS7D02G076300 | 361 | 44.3 | 7D | 2 |

U-unknown

**Table 2** List of OsTGW6 homologues including locus ID and location, size of gene product, amino acid identity to OsTGW6 and number of introns. Amino acid identity was compared using Emboss Needle

| Clade | Gene ID               | Amino acids | Percent amino acid ID with OsTGW6 | Chromosome | Introns |
|-------|-----------------------|-------------|-----------------------------------|------------|---------|
| I     | LOC_Os06g41850/OsTGW6 | 350         | 100.0                             | 6          | none    |
|       | LOC_Os06g41830        | 329         | 84.6                              | 6          | none    |
|       | LOC_Os06g41820        | 345         | 92.0                              | 6          | none    |
|       | LOC_Os07g35970        | 350         | 64.2                              | 7          | none    |
|       | LOC_Os07g36060        | 351         | 62.1                              | 7          | none    |
|       | LOC_Os07g36040        | 248         | 70.4                              | 7          | none    |
|       | LOC_Os07g35990        | 250         | 70.2                              | 7          | none    |
| II    | LOC_Os01g50330        | 324         | 48.6                              | 1          | 1       |
|       | LOC_Os08g34330        | 350         | 47.1                              | 8          | 2       |
|       | LOC_Os08g07810        | 356         | 47.3                              | 8          | 2       |
| III   | LOC_Os09g20810        | 362         | 45.4                              | 9          | 2       |
|       | LOC_Os09g20684        | 364         | 45.5                              | 9          | 2       |

**Table 3** Putative wheat orthologues of *OsSTRL2* showing percent amino acid identity to OsSTRL and TaTGW6, compared using Emboss Needle

| Gene ID            | Percent amino acid identity to<br>OsSTRL2 | Percent amino acid identity to<br>TaTGW6 |
|--------------------|-------------------------------------------|------------------------------------------|
| TraesCS4A02G089000 | 82.0                                      | 30.9                                     |
| TraesCS4B02G215300 | 81.0                                      | 31.6                                     |
| TraesCS4D02G215800 | 81.4                                      | 32.0                                     |

**Table 4** List of TaIAGLU homologues including locus ID, size of the gene product and amino acid identity to ZmIAGLU derived using Emboss Needle

| Gene ID<br>(IWGSC RefSeq v1.1) | Amino acids | Percent amino acid<br>ID with ZmIAGLU | Chromosome |
|--------------------------------|-------------|---------------------------------------|------------|
| TraesCS4D02G031500             | 500         | 58.1                                  | 4D         |
| TraesCS4A02G279400             | 452         | 62.0                                  | 4A         |
| TraesCS4D02G030900             | 453         | 62.1                                  | 4D         |
| TraesCS3B02G282600             | 453         | 62.1                                  | 3B         |
| TraesCS4B02G033000             | 504         | 59.0                                  | 4B         |





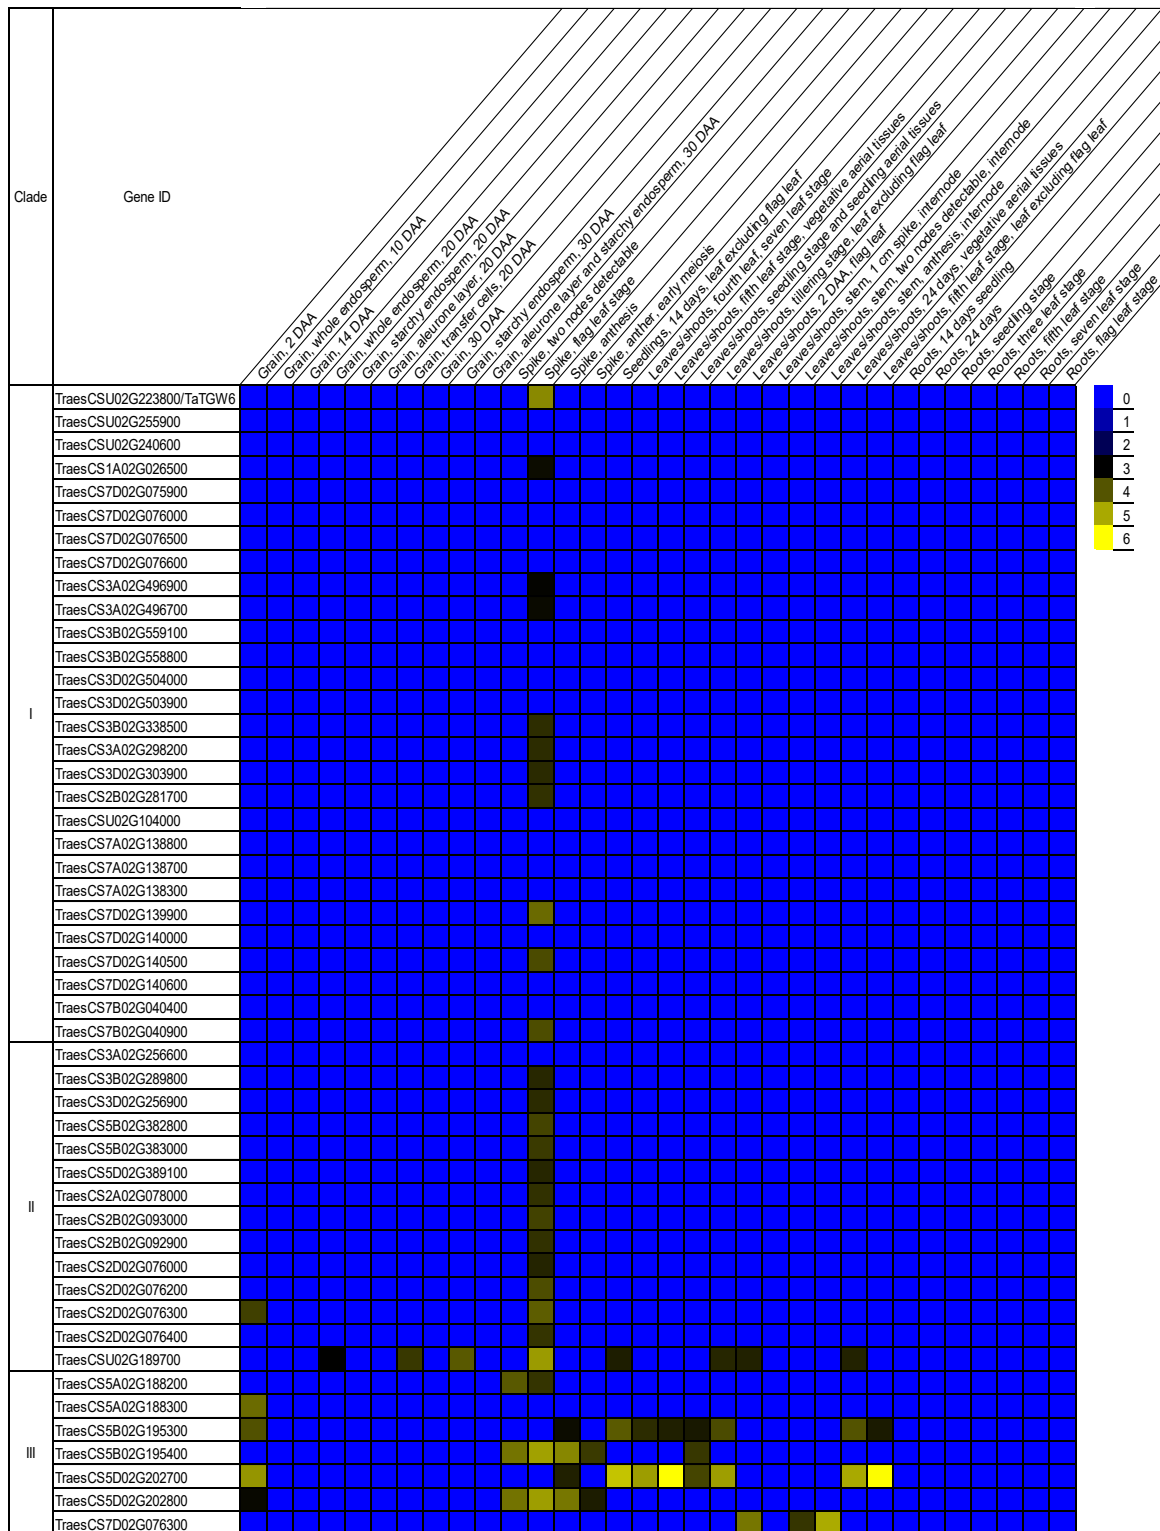

**Fig. 2** Heat map depicting expression of *TaTGW6* gene and its homologues based on RNA-seq data from Chinese Spring in expVIP (<http://www.wheat-expression.com>). The relative expression values are normalized in tpm (transcripts per million).

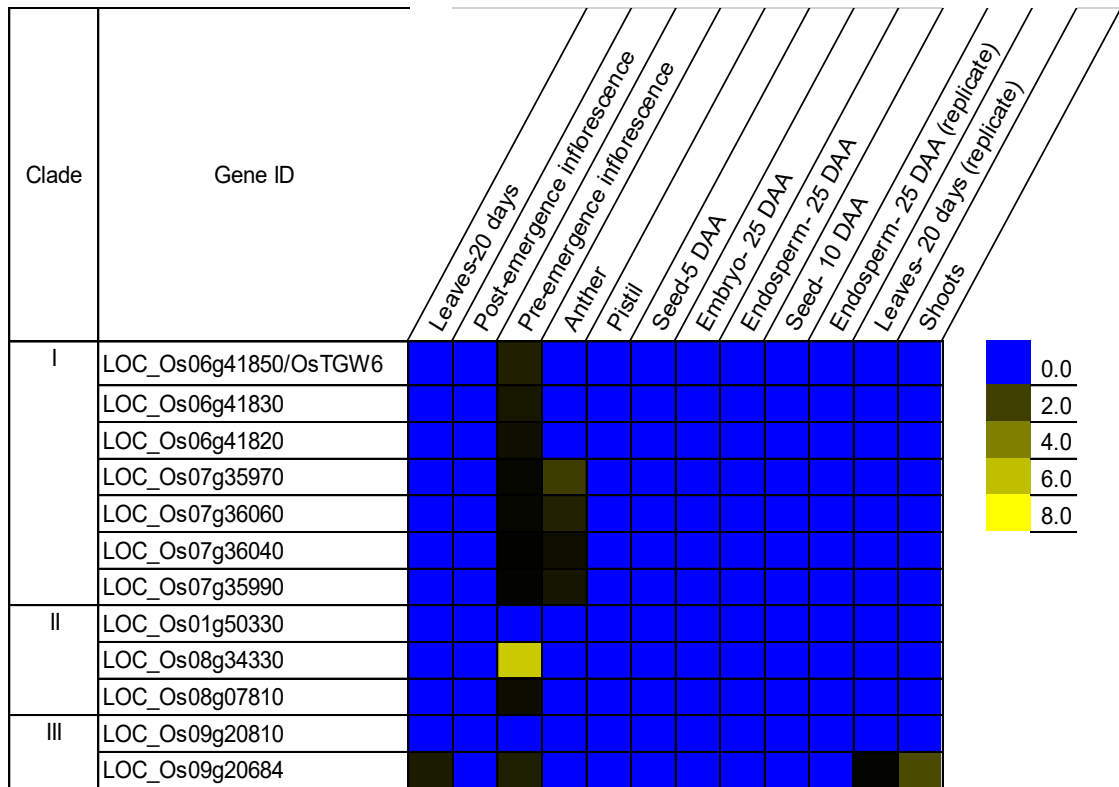

**Fig. 3** Heat map depicting expression of *OsTGW6* and its homologues based on RNA-seq data available in the Rice Genome Annotation Project (<http://rice.plantbiology.msu.edu>). Values are expressed as FPKM (Fragments Per Kilobase of transcript per Million mapped reads).

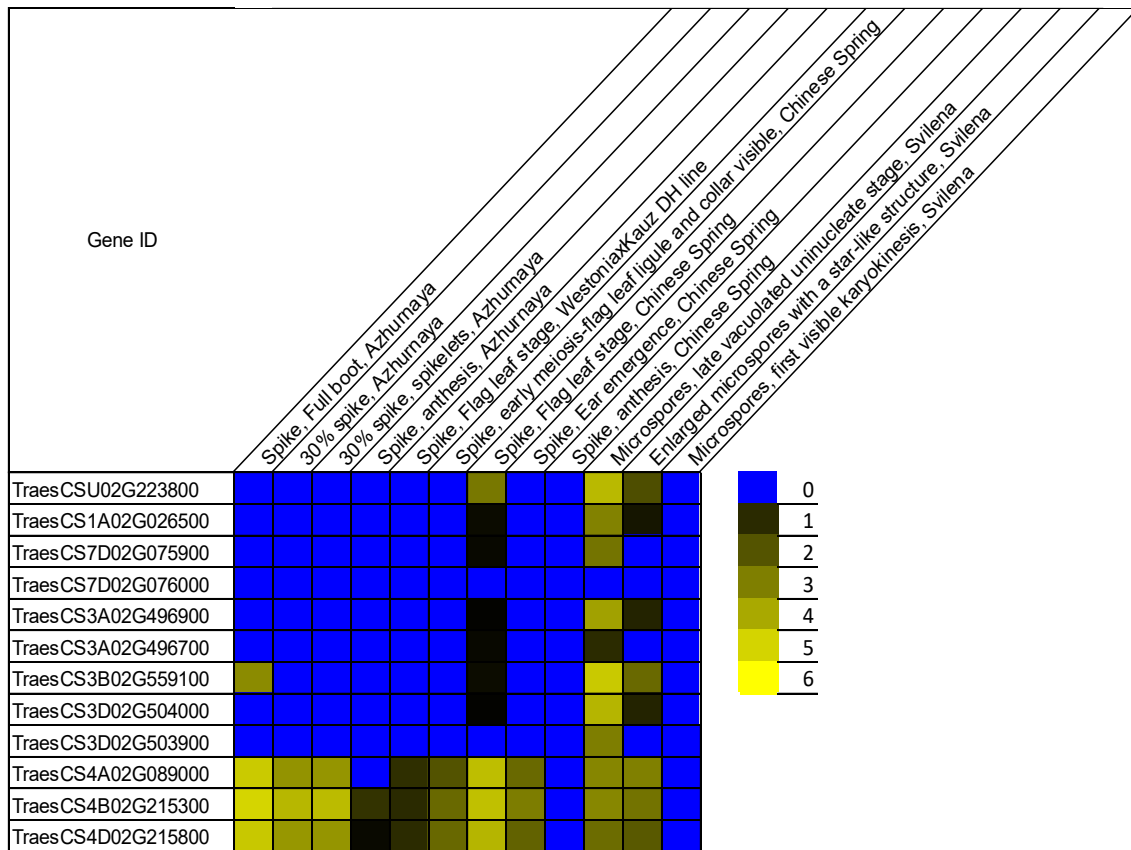

**Fig. 4** Heat map showing expression of full-length clade I *TaTGW6*-like genes as well as putative wheat orthologues of *OsSTRL2* in spike and microspore samples from four wheat varieties. The relative expression values are normalized in tpm (transcripts per million). Data come from three studies: Chinese Spring Development (Choulet et al. 2014), Azhurnaya development and spike drought (Ramírez-González et al. 2018), Microspores (Seifert et al. 2016) accessed via expVIP (<http://www.wheat-expression.com>).

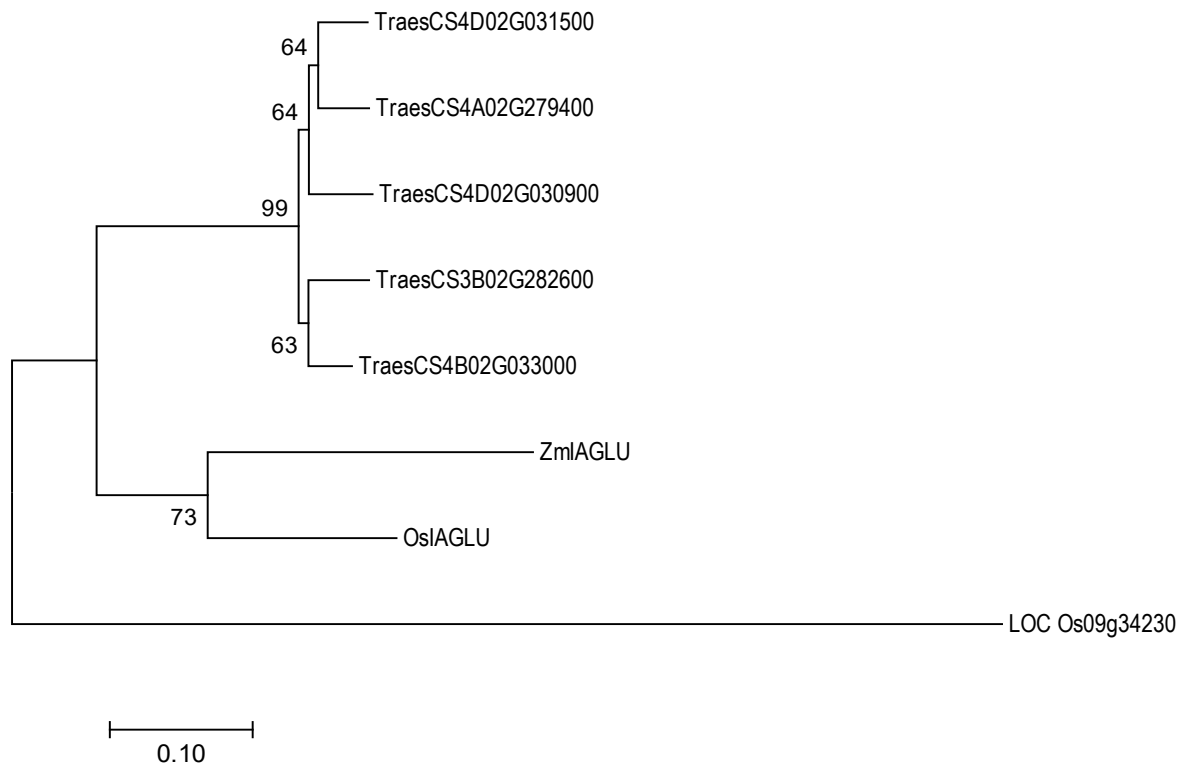

**Fig. 5** Phylogenetic tree showing relationships between IAGLU proteins from *Triticum aestivum* (Traes), *Oryza sativa* (Os) and *Zea mays* (Zm). The tree was constructed in MEGA7.0.26 (Kumar et al. 2016) using the Maximum Likelihood method (Jones et al. 1992). Multiple sequence alignment was performed by MUSCLE (Edgar 2004). Bootstrap confidence levels were obtained using 500 replicates (Felsenstein 1985). Evolutionary distances were computed using Poisson correction method (Zuckerandl and Pauling 1965). The tree was rooted using LOC\_Os09g34230 encoding a putative UDP-glucosyl transferase. Scale bar=0.1, amino acid substitutions per site.
